# Supplementary material for: Virtual reality platform for teacher training on classroom climate management: evaluating user acceptance
Source: Springer Nature journal article supplement (doi:10.1007/s10055-024-00973-6), 2024-03-16
Supplement: 10055_2024_973_MOESM1_ESM.pdf [file 10055_2024_973_MOESM1_ESM.pdf]

## Code book- Supplementary Material

**Table 1.** *Perceived ease of use. Descriptive analysis summary*

| Categories                    | <i>f (%)</i> | Sub-categories          | <i>f (%)</i> |
|-------------------------------|--------------|-------------------------|--------------|
| <b>Easy to use</b>            | 63 (30.1)    | Easy technical use      | 33 (52.4)    |
|                               |              | Physical Comfort        | 30 (47.6)    |
| <b>Physical discomfort</b>    | 23 (11.0)    | Dizziness               | 21 (91.3)    |
|                               |              | Blurry vision           | 2 (8.7)      |
| <b>Technical difficulties</b> | 92 (44.0)    | Joystick                | 23 (25.0)    |
|                               |              | VR glasses              | 5 (5.4)      |
|                               |              | Space control           | 9 (9.8)      |
|                               |              | Audio volume            | 13 (14.1)    |
|                               |              | Wires                   | 4 (4.3)      |
|                               |              | Unfamiliarity           | 36 (39.1)    |
|                               |              | Language                | 2 (2.2)      |
| <b>Input information</b>      | 31 (14.8)    | Context description     | 21 (67.7)    |
|                               |              | Time management         | 6 (19.4)     |
|                               |              | Pre-planning the lesson | 4 (12.9)     |

*Source:* Report of Coded Quotations using software Atlas.ti 23; n= 209 (quotations).

**Dimension PERCEIVED EASE OF USE:** It refers to the degree to which a user (teachers/pre-service teachers) perceives that using Didascalía VC will be effortless.

| Categories                | Sub-categories     | Sample quotes                                                                                                                                                                                                                                                                                                                                                                                                                                                                                                                                                                                                                                                                                                                                                                                                                             |
|---------------------------|--------------------|-------------------------------------------------------------------------------------------------------------------------------------------------------------------------------------------------------------------------------------------------------------------------------------------------------------------------------------------------------------------------------------------------------------------------------------------------------------------------------------------------------------------------------------------------------------------------------------------------------------------------------------------------------------------------------------------------------------------------------------------------------------------------------------------------------------------------------------------|
| Easy to use               | Easy technical use | <p>"The whole time it's been a little bit the same." [T_05_UAB]</p> <p>"I have managed very well, and I think that within what was there I did recognize all the elements and above all that it is very simple. And that's very good. because many times this reality thing is extremely complicated. You get dizzy. you don't pay attention because you don't know how it goes. So, it was perfect." [PT_GAM2406_UCM]</p> <p>"As you go along, there is indeed learning and very fast, because it doesn't take a lot of time either." [T_14_UAB]</p> <p>"It was my first time using this virtual reality tool. I didn't know how I was going to feel with it. But I think the fact that the tool is so intuitive, and I just operate a joystick controller made me understand it very fast and I felt comfortable." [PT_DMGO212_UCM]</p> |
|                           | Physical Comfort   | <p>I thought I was going to get dizzy, but I didn't. Great. great. great. I thought that maybe when I moved (I would get dizzy), but I moved well and I had the feeling that I was moving well. I hit it and turned around when I wanted to go down. Good. good. [T_25_Madrid]</p> <p>"I have seen a super. super simple interface to use and also very friendly." [PT_JCGC2503_UCM]</p> <p>"I have not been self-conscious when expressing myself orally or gestures." [T_08_Barcelona]</p>                                                                                                                                                                                                                                                                                                                                              |
| Physical Discomfort (PhD) | Dizziness          | <p>"The glasses were a bit uncomfortable because i suffer a bit from neck pain and they were quite heavy. So, there was a small moment at the beginning when i got a bit dizzy. but i didn't want to stop." [PT_PBI0305_UCM]</p> <p>"At the beginning. when I put on my glasses. There was a moment when I felt a little dizzy, but it was nothing serious. I was able to continue perfectly. but there was that moment when I felt a little bit dazed." [PT_LAM1602_UAB]</p> <p>"When moving around in reality i got quite dizzy. but these seem to me to be inevitable things of technology and also things that you get used to." [PT_TML0206_UCM]</p>                                                                                                                                                                                 |
|                           | Blurry vision      | <p>"First I was a little dizzy because I could see blurry. but the glasses were adjusted and I started to see perfectly well." [T_18_Madrid]</p>                                                                                                                                                                                                                                                                                                                                                                                                                                                                                                                                                                                                                                                                                          |
| Technical difficulties    | Joystick           | <p>"What I found most difficult was moving around. scrolling. with the buttons. At some point I lost sight of the students. Then I pushed a button too hard and the students came at me." [T_44_Barcelona]</p> <p>"I didn't quite understand some things. I mean, maybe I should have gone to the student, it was natural for me to go and talk to the student, as in the third situation. I tried, but I didn't succeed in hitting the joystick." [T_22_Madrid]</p>                                                                                                                                                                                                                                                                                                                                                                      |
|                           | VR glasses         | <p>"The gadgets they put on you, as always happens in life, are designed for people with a standard size. So, yes if you're too small, as in my case, they don't fit. for example, the glasses didn't fit me and when I squeezed them, they went out of focus. Then you see it blurry." [T_13_Barcelona]</p> <p>"Yes. decrease the weight of the helmet. jji. Ask beforehand if the person suffers from cervical problems" [PT_PBI0305_UCM]</p>                                                                                                                                                                                                                                                                                                                                                                                           |
|                           | Space control      | <p>"I think it would take more space, or maybe it's me. It's happened to me right away that I've left the stage because I like to walk around the class a lot, to reach everyone. And limiting the space also conditions, because the last ones are very far away." [T_02_Barcelona]</p> <p>"It would have been better in an enclosed space or in a closed classroom to avoid, for example, falling off the stage. Those are already small details." [PT_JSG0901_UCM]</p>                                                                                                                                                                                                                                                                                                                                                                 |
|                           | Audio volume       | <p>"Especially in the third situation I think there was a lack of volume because I didn't listen to the answer that the virtual character gave me" [T_01_UAB].</p>                                                                                                                                                                                                                                                                                                                                                                                                                                                                                                                                                                                                                                                                        |

|                          |                         |                                                                                                                                                                                                                                                                                                                                                                                                                                                                                                                                                                                                                                                                                                                                                                                                                               |
|--------------------------|-------------------------|-------------------------------------------------------------------------------------------------------------------------------------------------------------------------------------------------------------------------------------------------------------------------------------------------------------------------------------------------------------------------------------------------------------------------------------------------------------------------------------------------------------------------------------------------------------------------------------------------------------------------------------------------------------------------------------------------------------------------------------------------------------------------------------------------------------------------------|
|                          |                         | "In practice here the sound I do think you have to take it into account. because at the beginning there were like three groups here. they were watching videos apart. There are no headphones. I think it would be solved with headphones. And then I would hear the sounds louder like in a lab." [PT_MSP2807_UAB]                                                                                                                                                                                                                                                                                                                                                                                                                                                                                                           |
|                          | Wires                   | "It's this. that with wires by your feet it's like you have chains. You didn't know very well if you could walk more or less." [T_21_Barcelona_UAB]                                                                                                                                                                                                                                                                                                                                                                                                                                                                                                                                                                                                                                                                           |
|                          | Unfamiliarity           | "I guess at the beginning, because it was the first time, I had difficulty understanding how everything worked. It was a little bit that feeling, of..., Okay, I don't know where I must press, where I have to aim, or how to do it" [T_01_Barcelona].<br>"I think it would be good to have 20 seconds to get used to it before starting the first game. 20 seconds to try moving. try talking. try looking at the faces..." [PTGPA1509_UAB]                                                                                                                                                                                                                                                                                                                                                                                 |
| <b>Input information</b> | Context description     | "At first I couldn't process it all. I'd like it better if it was auditory and not having to read. Yes, because now you walk in and you're looking at everything. You want to see the whole environment first so you can locate yourself. And then, at the same time you have to locate yourself, you also have to read." [T_14_Barcelona]<br>"At the beginning I didn't know what I was going to find when I started the experience. I knew it was facing a situation in the classroom, but I didn't know it was going to be about something conflictive. Then, when the first character had that reaction, I just stopped. I said, where is this coming from? I didn't know how to react and I was starting to break out in a cold sweat from feeling uncomfortable and thinking how do I shortcut this." [PT_JCGC2503_UCM] |
|                          | Time management         | "With the times I got a little lost about when it was that I had to react. But hey. it was real too." [T_14_Barcelona]<br>"One thing that would be better would be to give a little bit more time at the beginning. because I felt that so fast the bell rings. you start or they already answer you. Maybe if you let that introduction last a little bit longer you can get more into it, so that you are even more immersed. I mean. give you a little bit of time. even if you're talking nonsense. but sit more in the classroom in front of the students until the conflict arises." [PT_MPA2607_UCM]                                                                                                                                                                                                                   |
|                          | Pre-planning the lesson | "At the beginning a little bit of bewilderment because I did not know how to start" [PT_LAM1602_UAB].<br>" (...) we were thrown right into the test and I didn't understand what to do. It was like giving the class, okay, but what class? what do I say? Because of course, it's not the first time I've been in a classroom. I've been a teacher for several years" [PT_PBS3006_UCM]                                                                                                                                                                                                                                                                                                                                                                                                                                       |

*Citation legend: T: teacher; PT: preservice teacher; UAB: Universitat Autònoma de Barcelona; UCM: Universidad Complutense de Madrid. The sequence of numbers or letters corresponds to the code assigned to the participant. PT or T respectively.*

**Table 2.***Perceived usefulness. Descriptive analysis summary*

| <b>Categories</b> | <b>f (%)</b> | <b>Sub-categories</b>                        | <b>f (%)</b>     |
|-------------------|--------------|----------------------------------------------|------------------|
| <b>Immersion</b>  | 68 (16.1)    | <b>Stepped inside the classroom</b>          | 38 (55.9)        |
|                   |              | <b>Being in the teaching role</b>            | 30 (44.1)        |
| <b>Realism</b>    | 312 (74.2)   | <b>Physical realism</b>                      | <b>93 (29.8)</b> |
|                   |              | <i>Lifelike of the student avatars</i>       | 74 (79.6)        |
|                   |              | <i>Number of students in class</i>           | 18 (19.4)        |
|                   |              | <b>Common classroom conflicts</b>            | <b>73(23.4)</b>  |
|                   |              | <b>Interactive tasks and decision-making</b> | <b>98 (31.4)</b> |
|                   |              | <i>Limited interactivity</i>                 | 63 (64.3)        |
|                   |              | <i>Limited options to act</i>                | 19 (19.4)        |
|                   |              | <i>Restricted time</i>                       | 16 (16.3)        |
|                   |              | <b>Performance tracking and feedback</b>     | <b>48 (15.4)</b> |
|                   |              | <b>Safety</b>                                | 41 (9.7)         |
| <b>Enjoyable</b>  | 17 (41.5)    |                                              |                  |
| <b>Confidence</b> | 7 (17.1)     |                                              |                  |

*Source:* Report of Coded Quotations using software Atlas.ti 23; n= 421 (quotations).

**Dimension PERCEIVED USEFULNESS:** It refers to degree to which the user perceives that the use of the Didascalia VC system can foster his/her competence to manage classroom conflicts.

| Categories | Sub-categories                  | Sample quotes                                                                                                                                                                                                                                                                                                                                                                                                                                                                                                                                                                                                                                                                                                                                                                                   |
|------------|---------------------------------|-------------------------------------------------------------------------------------------------------------------------------------------------------------------------------------------------------------------------------------------------------------------------------------------------------------------------------------------------------------------------------------------------------------------------------------------------------------------------------------------------------------------------------------------------------------------------------------------------------------------------------------------------------------------------------------------------------------------------------------------------------------------------------------------------|
| Immersion  | Stepped inside the classroom    | <p>"I have had the feeling of being in front of a class. I mean, when you start working and you enter a class, those seconds before you start and you see the kids and you must think very well what you are going to say your words, but you also get a little bit of forehead, a little bit of insecurity or a little bit of fear sometimes or challenge. So, I've felt that. Yes, yes, yes, yes." [T_10_ Barcelona]</p> <p>"Yes, yes, yes, it helps you to put yourself in the situation of being in front of the students and having their silence and deciding what you have to say. You must fill all the time that silence and those situations, that feeling is very well achieved. That's what I liked the most." [PT_OSP1112_UAB]</p>                                                 |
|            | Being in the teaching role      | <p>"I had the feeling that I had to do something as a teacher, like keeping order in the classroom." [T_27_Madrid]</p> <p>"What I liked is basically that the videogame offers you the possibility to really put yourself in the shoes of a teacher and not as trainees, but in our teaching role." [PT_MSG0306_UAB]</p>                                                                                                                                                                                                                                                                                                                                                                                                                                                                        |
|            | Physical realism                | <p>"What has been most surprising is that there is an environment to experiment, a laboratory to teach. You find yourself in a real situation. Until now, that was unimaginable for me. That was what surprised me the most." [T_12_ Barcelona]</p>                                                                                                                                                                                                                                                                                                                                                                                                                                                                                                                                             |
| Realism    | Lifelike of the student avatars | <p>"Another thing that could be improved is this aspect of giving reality at the level of movement and expression (of the students)." [T_6_ Barcelona]</p> <p>"I have experience as a camp instructor and in private lessons with teenagers and I know that my performance is much calmer, more objective and fairer in the face of the facts. In the end we don't have all the information about the students and that cold situation I think is what makes you nervous." [PT_PBI0305_UAB]</p>                                                                                                                                                                                                                                                                                                 |
|            | Number of students in class     | <p>"Maybe more students. Because of course, classes, for example, that have 32 students are already imposing, because there are many students, a few students with the teacher gives more confidence." [T_27_Madrid]</p> <p>"Maybe because of the diversity issue that there was a student who is marked in red or in another colour that you know has attention deficit, for example, to be able to say: well, this person I am going to put in front of everything, or something like that." [PT_CSM2107_UAB]</p>                                                                                                                                                                                                                                                                             |
|            | Common classroom conflicts      | <p>"I knew I was like that it was a simulation. I was trying to put myself in the situation more or less comfortably and coping with those situations, because they are situations that have happened to one in the classroom." [T_10_ Barcelona]</p> <p>"Yes, I liked it above all because I think that in managing the classroom climate everyone has many fears and is a little frustrated, even a little scared at the beginning. And this is a way to get rid of that uneasiness that can sometimes hinder more than even the classroom situation itself. To visualize what kind of problems there might be in the classroom. I wouldn't have thought of being insulted before, that alone is a contribution. Real life. Well, that's very good, that's not made up." [PT_SME1511_UCM]</p> |

|                                              |                                                                                                                                                                                                                                                                                                                                                                                                                                                                                                                                                                                                                                                                                                                                                                                                                                                                                                                                                                                                                                                                                                                                                                                                                                                                                                                                                                                                                                                                                                                      |
|----------------------------------------------|----------------------------------------------------------------------------------------------------------------------------------------------------------------------------------------------------------------------------------------------------------------------------------------------------------------------------------------------------------------------------------------------------------------------------------------------------------------------------------------------------------------------------------------------------------------------------------------------------------------------------------------------------------------------------------------------------------------------------------------------------------------------------------------------------------------------------------------------------------------------------------------------------------------------------------------------------------------------------------------------------------------------------------------------------------------------------------------------------------------------------------------------------------------------------------------------------------------------------------------------------------------------------------------------------------------------------------------------------------------------------------------------------------------------------------------------------------------------------------------------------------------------|
| <b>Interactive tasks and decision-making</b> | <p><i>"Even though they are avatars, I think there are emotions. It's a similar process to when you're in front of the classroom. The exercise of saying oops, look for an alternative to re-engage this student or look for an alternative to stop putting the focus on the refusal and persuade." [T_11_Barcelona]</i></p> <p><i>"I perceived the possibility of knowing how I would act in certain situations. Because it is not the same watching a video, in a video you have nothing to say in this one, but here, depending on what you did, the situation continued." [PT_MNM2310_UAB]</i></p>                                                                                                                                                                                                                                                                                                                                                                                                                                                                                                                                                                                                                                                                                                                                                                                                                                                                                                               |
| <b>Limited interactivity</b>                 | <p><i>"I no longer remember what I said to him about the insult, but I do remember that, that I don't know, I was talking to him (avatar) and he didn't change his expression." [T_08_Barcelona]</i></p> <p><i>"In general, my way of approaching things is to read all the time what the student is saying and what the group is giving you. And not being able (in the experiment) to be able to read (there was no feedback) I was going a little bit sold." [PT_OEM2807_UAB]</i></p> <p><i>"The only 'but' that I have put and that I have commented before to my colleagues is that in the end, of course, you manage, you can see a part of how you manage, which is with your voice, but I think that a class goes much further. You express yourself with non-verbal language, with looks, with other types of things that the application does not include and I think that if it were there it would be much more complete, but yes, very good." [PT_FGS0203_UCM]</i></p>                                                                                                                                                                                                                                                                                                                                                                                                                                                                                                                                  |
| <b>Limited options to act</b>                | <p><i>"You are already prepared, that is, you enter the classroom and you see marked in red the student (avatar) who is going to react. And that also means that you don't pay attention to the others because you are already forewarned. In a normal classroom you will be there, you will see and you will not have to see it at the moment. You don't know who's going to do it and you don't know what's going to happen. And having that preparation is a little bit strange." [T_05_Barcelona]</i></p> <p><i>If we are working to let's make the students participate in the activity and the form of virtual reality is like you have to give a master class because the student has no response, it's a bit of a shock, isn't it, because if the university is shooting for "let's train teachers who work with the students", but then the students in virtual reality don't participate in the activity, there is a shock, I think. [PT_NC2910_UAB]</i></p> <p><i>"Also, for lack of having a clear objective. That is, I am quite square in that sense. Whenever I enter a classroom, I always have a clear idea of what I want to do, and in this situation, I didn't know what I should be doing, except for waiting for the interruption. In the face of an implementation in training it seems to me that it might be a good thing to have something that allows you to imagine whether it's acting in a classroom or whether we're opting for a five-minute presentation." [PT_TML0206_UCM]</i></p> |
| <b>Restricted time</b>                       | <p><i>"I would have maybe ignored. And sure, I would have liked to see what happens with that action, but it's over very quickly. You ignore, but then you're keeping an eye on how that action evolves, right? And the response continues. Maybe you're going to do something else, but then you go back to the girl you ignored. I think the one-off action would actually have more run." [T_02_Barcelona]</i></p> <p><i>"I think I did well. But it's just that I didn't have time to go talk to the group or anything. So yes, what I would do would be to go talk to the group without her (the disruptive student), have them explain to me what's going on." [PT_OSP1112_UAB]</i></p>                                                                                                                                                                                                                                                                                                                                                                                                                                                                                                                                                                                                                                                                                                                                                                                                                        |
| <b>Performance tracking and feedback</b>     | <p><i>"I didn't feel the feedback right and I also didn't know when to stop, I thought it would let me know when I had to leave. I think I skipped something." [PT_OEM2807_UAB]</i></p>                                                                                                                                                                                                                                                                                                                                                                                                                                                                                                                                                                                                                                                                                                                                                                                                                                                                                                                                                                                                                                                                                                                                                                                                                                                                                                                              |

|               |                               |                                                                                                                                                                                                                                                                                                                                                                                                                                                                                                                                                                                                                                                                                                                                                                                                                                                                                                                                                                                                                                                                                                                                                                                                                                                                                                                                                                                                                                                                                                 |
|---------------|-------------------------------|-------------------------------------------------------------------------------------------------------------------------------------------------------------------------------------------------------------------------------------------------------------------------------------------------------------------------------------------------------------------------------------------------------------------------------------------------------------------------------------------------------------------------------------------------------------------------------------------------------------------------------------------------------------------------------------------------------------------------------------------------------------------------------------------------------------------------------------------------------------------------------------------------------------------------------------------------------------------------------------------------------------------------------------------------------------------------------------------------------------------------------------------------------------------------------------------------------------------------------------------------------------------------------------------------------------------------------------------------------------------------------------------------------------------------------------------------------------------------------------------------|
|               |                               | <p>"Maybe it could also be good to talk about that rise, that escalation of the conflict, those small things, but that day after day, are taking weight, instead of doing three different situations, as a consequence of what you did this day, for example, if you were permissive, you didn't care that he kept eating the gum, and the next day or a week later it is no longer one student, it is five or those who are with the gum, for example." [PT_CSM2107_UAB]</p> <p>"I would do this practice in a class or a session to teach that this exists. And then maybe, if you could, you could contemplate the idea of having it apart so that you, when you want, make another immersion; to be able to use it and see an evolution that you have had with the application, to notice that difference that there is from the first time you use it. After a while, that you use it again." [PT_IPB1012_UCM]</p> <p>"Obviously technologically speaking it's complicated, but I think it's very important that the reactions, the feedback that the program gives you are as realistic as possible. That, because, effectively, it's not about your handling of the situation itself, it's about the reaction to your handling of the disruption that the students create. We are talking about to what extent we can expect a reaction to the tone of voice, to the words you are saying (...) " [PT_TML0206_UAB]</p> |
|               | <b>Controlled environment</b> | <p>"It is valued to do a rehearsal in a safe environment in which there are really no consequences for the girls and boys, which I think is also interesting, to be able to go prepared before facing a classroom" [T_05_Barcelona]</p> <p>"It has been more of a 'getting rid of fear', that in a couple of classes I take it away from you. I rather see it to have a first approach to the classroom." [PT_SME1511_UCM]</p>                                                                                                                                                                                                                                                                                                                                                                                                                                                                                                                                                                                                                                                                                                                                                                                                                                                                                                                                                                                                                                                                  |
| <b>Safety</b> | <b>Enjoyable</b>              | <p>"I liked the quick reactions, that everything went fast. That I didn't have to give a lot of class, that things happened right away, that I didn't have time to concentrate much in class because I was already playing, let's say." [T_02_Barcelona]</p> <p>"In fact, being a game, we can put it on pause. Obviously, pause to think. Of course, this would be an ideal exercise to do in psychology class. Of course, this would be an ideal exercise to do in the psychology class. Of you, to be doing this activity and we stop to comment with the whole class: What would be done? What could be done? What would be a possible action-reaction?" [PT_ARM2602_UAB] [PT_ARM2602_UAB] [PT_ARM2602_UAB].</p>                                                                                                                                                                                                                                                                                                                                                                                                                                                                                                                                                                                                                                                                                                                                                                            |
|               | <b>Confidence</b>             | <p>"In the end, when you're in the classroom environment, you're in front of the students and in other work experiences I've had when I had my boss hanging around, it conditioned how I handled myself, in this case with the children, because I had the pressure of "let's see how I do it." [PT_JFA1102_UCM]</p> <p>"I liked the experience itself, that is, being able to face that situation also having that security that you can make a mistake, you can fail. Nothing happens. It's a virtual environment, it's in a friendly environment, you're with peers, with your professors." [PT_JCGC2503_UCM]</p>                                                                                                                                                                                                                                                                                                                                                                                                                                                                                                                                                                                                                                                                                                                                                                                                                                                                            |

*Legend of the quotes:* T: teacher; PT: preservice teacher; UAB: Universitat Aut3noma de Barcelona; UCM: Universidad Complutense de Madrid. The sequence of numbers or letters corresponds to the code assigned to the participant, PT or T respectively.

**Table 3.** Behavioral intention. Descriptive analysis summary

| Categories                                        | <i>f (%)</i> |                                                   |              |
|---------------------------------------------------|--------------|---------------------------------------------------|--------------|
| Self-learning                                     | 22 (10.1)    |                                                   |              |
| Observer experimentation                          | 82 (37.8)    |                                                   |              |
| Progressive training                              | 27 (12.4)    |                                                   |              |
| Used advanced technologies for authentic learning | 19 (8.8)     |                                                   |              |
|                                                   | <i>f (%)</i> | <b>Sub-categories</b>                             | <i>f (%)</i> |
| <b>Pre-internship training</b>                    | 67 (37.4)    | <i>Familiarization with the classroom setting</i> | 36 (53.7)    |
|                                                   |              | <i>Learning Emotional Regulation</i>              | 18 (26.9)    |
|                                                   |              | <i>Understanding the theory</i>                   | 13 (19.4)    |

Source: Report of Coded Quotations using software Atlas.ti 23; n= 217 (quotations).



**Dimension BEHAVIORAL INTENTION (BI):** It refers to the likelihood of adopting the Didascalía VC system as an environment for teaching and learning the classroom climate management competence.

| Categories                      | Sample quotes                                                                                                                                                                                                                                                                                                                                                                                                                                                                                                                                                                                                                                                                                                                                                                                                                                                                                                                                                                                                                                                                                                                                                                                                                                                                                                                                                                                                                                                                                                                                                                                                                                                                                                                                                                                                                                                                                                                                                                                                                                                                                                                                                                                                                                                                                                       |
|---------------------------------|---------------------------------------------------------------------------------------------------------------------------------------------------------------------------------------------------------------------------------------------------------------------------------------------------------------------------------------------------------------------------------------------------------------------------------------------------------------------------------------------------------------------------------------------------------------------------------------------------------------------------------------------------------------------------------------------------------------------------------------------------------------------------------------------------------------------------------------------------------------------------------------------------------------------------------------------------------------------------------------------------------------------------------------------------------------------------------------------------------------------------------------------------------------------------------------------------------------------------------------------------------------------------------------------------------------------------------------------------------------------------------------------------------------------------------------------------------------------------------------------------------------------------------------------------------------------------------------------------------------------------------------------------------------------------------------------------------------------------------------------------------------------------------------------------------------------------------------------------------------------------------------------------------------------------------------------------------------------------------------------------------------------------------------------------------------------------------------------------------------------------------------------------------------------------------------------------------------------------------------------------------------------------------------------------------------------|
| <b>Self-learning</b>            | <p>"Well, I and my colleagues were talking about it before, like some kind of cabin that can be seen in universities or in training centers, more personal, quieter, where you can even take notes on what you are thinking, and not so exposed, perhaps to other colleagues of the same category, as are also other future trainers." [PT_PBI0305_UCM]</p> <p>Maybe I would introduce it in a class seeing that the format is also attractive to us, who are in training. And yes I would love for this to be on the faculty, somewhere in a lab, as I said, so we can go whenever we want, by making an appointment. I would indeed like that." [PT_DMGO212_UCM]</p> <p>"Yes, I would recommend it in workshops to explain how it works and then they can apply it on themselves the teachers in their own time or in school projects or how to stay in the center." [PT_JGS1309_UAB]</p> <p>"you can start practicing, think about what you would do not only at that moment, but when you finish, you say and what would I have done at this moment? You reflect on it, an afterthought which is very useful." [PT_STB0808_UCM]</p> <p>"And also that they would give us some professional or something, some tips on how we can manage it ourselves." [PT_AGB2607_UCM]</p>                                                                                                                                                                                                                                                                                                                                                                                                                                                                                                                                                                                                                                                                                                                                                                                                                                                                                                                                                                                                                                     |
| <b>Observer experimentation</b> | <p>"In fact, I already use the topic of conflict resolution and incidents in the classroom and I have always done it through student plans, simulating a scene that I leave them prepared in writing and the rest of the class, values. Well, I would do the same, but instead of them doing theatre, they will be doing it with a virtual reality that is more immersive and, in addition, I link it with the use of technologies, which is also part of the syllabus that I teach in the subject." [T_16_Madrid]</p> <p>"Yes, I would like, that it had feedback, not only those data that appear now on screen, but that you could see something more than the emotions you felt. For example, how you moved. But maybe that's not so immediate. Maybe it can be after the rehearsal in virtual reality, a shared reflection. We can see what happened and you (the trainer) can tell me that you didn't notice that your gaze was not directed at the student, or that you didn't pay attention to something that was happening. It would be like becoming aware of yourself, reflecting on how you have acted" [T_04-Barcelona].</p> <p>This had to be accompanied by previous and subsequent work. Previously, to generate interest in the subject, to learn about previous experiences, to comment on the situations that have been encountered. It would be, first, to put us in situation of what is the classroom climate and then this test what this tool allows. This part of having the experience would have to be included." [T_04-Barcelona]</p> <p>"I think that maybe I would establish some sessions of the plan, I don't know, one Friday a month or every two weeks. And maybe do that, make groups and for example, this person will have the classroom scenarios, another person will have the interview scenario with parents and so on. So, I would see it as something that has to be done, as something, as mandatory I think, and in small groups to organize better, but also that everyone participates. For example, in the classroom scenario, that one acts and the others observe. Then if it is the scenario of practicing with an interview with a parent, that another person does it and the others observe, that everyone has the opportunity to act." [PT_JAG1601_UAB]</p> |
| <b>Progressive training</b>     | <p>It could be done with a certain type of programming, with a certain consistency because a five-minute experience is more useful to open the eyes to what can be done, but I don't think it would be very useful" [PT_TML0206-UCM].</p> <p>"It seems interesting to me for teacher training, but it would have to be gradual to go from simpler to more complex activities, like a training." [T_05-Barcelona]</p> <p>"What I would do is prepare a little bit before, for example, prepare that I am going to give the class, even if it is only for a minute, because I literally did not know what to say. So then prepare it a little bit before, mentalize that you are going to be in that situation and prepare a minute of class so that</p>                                                                                                                                                                                                                                                                                                                                                                                                                                                                                                                                                                                                                                                                                                                                                                                                                                                                                                                                                                                                                                                                                                                                                                                                                                                                                                                                                                                                                                                                                                                                                              |

---

*then everything flows better, so that you don't have to be aware of 'let's see what I say', not only to face the problem, because really you as a teacher are going to go prepared to class."* [PT\_ OSP1112-UAB]

*"Since it is thought for them to practice the different specialties, what we could say is to say that they would think in a class that you are going to develop a little bit, have in mind what you would do: Yes, maybe because in the previous preparation, the presentation of the activity you could agree, among all, what you can talk about depending on the specialty."* [PT\_ NC2910\_UAB]

*"What I would mainly do the program is that the different actions and things that are happening are not programmed automatically by time or I don't know how they are programmed, but that it is by keys and that the teacher himself who is handling the laptop decides when the student gets up, for example, or when the student complains or when the group starts to murmur. This would give much more leeway and you could adapt to what the learner is saying"* [T\_16\_Madrid].

*"Above all I think it would be important to do it without commenting on the previous context, without saying there are going to be conflicts, because otherwise we are already ready to act and facing certain class conflicts. Otherwise, simply say: now you are going to do an activity in a virtual classroom. And that's it. And You pretend you're doing a class. And you don't know what's going to happen. Then, of course, when you see the conflict, you are already detecting that something problematic is happening and you can act in a more natural and unpredictable way, which is how you would do it in a normal classroom."* [PT\_ ARM2602\_UAB]

*"In fact, being a game, we can put it on pause. Obviously, pause to think. Of course, this would be an ideal exercise to do in psychology class. Of course, this would be an ideal exercise to do in the psychology class, from you, to be doing this activity and we stop to comment with the whole class: What would be done? What could be done? What would be a possible action-reaction? Let's see, we already do it with videos. But of course, this is a much more interactive way. You expose yourself to the situation. It's not the same being the spectator as being the protagonist."* [PT\_ ARM2602-UAB]

*"We have also been discussing it before and with the children to put them in the situation of the teacher to the children of the virtual reality, also to the children that would also be good for them to put on the glasses and see how they would act in a situation like that. Yes, that would also be very good."* [PT\_ CGA2011\_UCM]

*"I would conceive it more as a final project, something of laboratory, something that we could be preparing throughout the course and introduce it at the end, or maybe not at the end at all, but something that would have a previous preparation, not put directly. Maybe before the internship or after the first observation period to be able to contrast information. But I would do more like a project."* [PT\_ MCG0509\_UAB]

*"This should be accompanied by previous and subsequent work. Previously generate interest in the subject, learn about previous experiences, comment on the situations that have been encountered. It would be, first, to put us in situation of what is the classroom climate and then this test what this tool allows. This part of having the experience should be included. And I would like to have feedback, not only those data that appear now on the screen, but that you could see something more than the emotions that you felt. In order to learn it is necessary to become aware afterwards and in this virtual environment you could even pass again. But that second test would have to be subsequent to a reflection on what has happened."* [T\_04\_Barcelona]

*"And while it is true that we were talking about it in a group that it would be very nice to be able to do this with a lot of actors who were trained to respond to all the situations, etcetera as a role playing like this in a beastly way. That is quite complicated to implement in any teacher training. So, something like this seems like a good solution to me"* [PT\_ JHF2402-UCM].

---

**Used advanced technologies for authentic learning**

*"Of course, and the more these programs advance, the much, much better. I'm totally betting and, as I say, it can be a test for us who train to be teachers, even when, as I told you before, things have improved, that we even get to have hyper-intelligent responses from artificial intelligence. And I would also hope that the relevant authorities would invest money in this kind of thing. Of course, and the more these programs advance, the much, much better. I'm totally betting on this."* [PT\_ GAM2406\_UCM]

*"I think technologies are very good, but we have to take into account mitigating factors, as in other circumstances, socioeconomic gaps that not everyone can access, intergenerational gaps, not everyone knows the technology. There is a literacy behind in a high school that is light years away from being*

---

---

*equal or equitable for everyone. So, yes, I would recommend it with other types of situations, other types of guidelines and, obviously, with greater accessibility" [PT\_MDL0311\_UCM].*

---

**Pre-internship training**

---

**Familiarization with the classroom setting**

*"I think we are asked a lot for this training in direct practice. If you don't have the practice yet, well these are way to introduce it." [T\_09\_Barcelona]*  
*"Yes, because it brings us closer to situations that can be real and would prevent us from being caught out of the blue. It seems to me the key point of this tool." [PT\_ALA2805-UCM]*  
*"I do recommend it because they can be situations that we do encounter that are quite common, some of these were common. And it can be quite curious because it's like reliving cases that you would have had where maybe you think: this I didn't quite solve it right or it didn't go well for me, or I think I could improve this aspect. Let's get our glasses in and see how I improve it." [PT\_JGS1309-UAB]*

---

**Learning Emotional Regulation**

*"I think it can be very interesting, because on the one hand there is the security that a system like this gives you. You don't expose yourself so much, on the other hand it is quite immersive and you have feelings and so on, because they are very similar to what you would have" [T\_03\_Barcelona].*  
*This, looking for an alternative, is what I find very convenient. You are also forced by the concern that suddenly arises, oops, she's up. I have a conflict, what do I do, do I attend to the individual or the group? Well, all these dilemmas emerge a little bit. And if you practice this it would have a calming effect on teacher education." [T\_11\_Barcelona]*  
*"It is very relaxed to be able to talk about a situation of some conflictive students and my emotional management of it without these people existing, because it seems to me much healthier than working with real people, who are much more vulnerable and in the end also who are minors and who are a quite vulnerable audience. So, I would highly recommend that." [PT\_LPR0409\_UAB] [PT\_LPR0409\_UAB].*

---

**Understanding the theory**

*First, maybe I would also give some theoretical training, because if there is no theoretical training regarding this, on how to manage a class, this is generally not addressed. Then it would be a matter of thinking if first there is an exposure, then a training and then again an exposure, for example, in phases, but without a basis also of explaining because it is good to know why you do things." [T\_10\_Barcelona]*  
*"What they ask a lot in these training courses is this content. I see that it has basically three pillars. One is the theoretical framework and the next one would be a reflective framework from this theoretical framework. And then there should be a more practical part, in which the teacher is shown casuistries that can be found when he/she starts in the working life. What teachers value most are practical examples." [T\_13\_Barcelona]*  
*"Now we were dealing in class with non-violent language of how to address students with problems that make your classes more difficult. I think this is a good activity to deal with those cases, using nonviolent language to solve problems in classes, in the classroom." [PT\_VRP2612\_UAB]*

---

**Table 4.***Attitude: Perceived emotions. Descriptive analysis summary*

| <b>Categories</b>                | <b>f (%)</b> | <b>Sub-categories</b>           | <b>f (%)</b> |
|----------------------------------|--------------|---------------------------------|--------------|
| <b>Positive arousal emotions</b> | 95 (56.9)    | Enjoyment                       | 29 (30.2)    |
|                                  |              | Curiosity                       | 34 (35.8)    |
|                                  |              | Pleasure                        | 17 (17.7)    |
|                                  |              | Challenge                       | 10 (10.4)    |
|                                  |              | Enthusiasm                      | 6 (6.3)      |
| <b>Negative arousal emotions</b> | 69(41.4)     | Nervous                         | 31 (44.9)    |
|                                  |              | Uncertainty                     | 17 (24.6)    |
|                                  |              | Frustration                     | 9 (13.0)     |
|                                  |              | Discomfort,<br>hostile, fearful | 15 (21.7)    |
| <b>Emotional deactivation</b>    | 3(1.7)       | Disappointing                   | 1 (.3)       |
|                                  |              | Uncomfortable                   | 2 (.7)       |

Source: Report of Coded Quotations using software Atlas.ti 23; n= 167 (quotations).

**Dimension. ATTITUDE (ATT).** It refers to the emotions (positive or negative arousal) experienced by the user in the Didascalia VC experience.

| Categories                       | Sub-categories | Sample quotations                                                                                                                                                                                                                                                                                                                                                                                                                                                                                                                                                                                                                                                                                                                                                                                                                                                                                                                                                                |
|----------------------------------|----------------|----------------------------------------------------------------------------------------------------------------------------------------------------------------------------------------------------------------------------------------------------------------------------------------------------------------------------------------------------------------------------------------------------------------------------------------------------------------------------------------------------------------------------------------------------------------------------------------------------------------------------------------------------------------------------------------------------------------------------------------------------------------------------------------------------------------------------------------------------------------------------------------------------------------------------------------------------------------------------------|
| <b>Positive arousal emotions</b> | Enjoyment      | "I have felt very comfortable, to tell you the truth. I mean, emotionally well. I found the activity itself entertaining" [PT_CSM2107_UAB] [PT_CSM2107_UAB].                                                                                                                                                                                                                                                                                                                                                                                                                                                                                                                                                                                                                                                                                                                                                                                                                     |
|                                  | Curiosity      | "I liked it because it makes you aware of how you react, so it awakens sensations. It's curious, yeah, yeah." [T]<br>"Surprisingly, I thought it was quite real in that sense that you find yourself in front of the shag and in front of the class to be able to perform." [PT]                                                                                                                                                                                                                                                                                                                                                                                                                                                                                                                                                                                                                                                                                                 |
|                                  | Pleasure       | "It's been great. I think it's all very much on track at the moment and I'm really glad I tried it." [PT_MCG0509-UAB]                                                                                                                                                                                                                                                                                                                                                                                                                                                                                                                                                                                                                                                                                                                                                                                                                                                            |
|                                  | Challenge      | "What I liked the most was the challenge of, okay, now how do I deal with this situation?" [PT_JHF2402_UCM]                                                                                                                                                                                                                                                                                                                                                                                                                                                                                                                                                                                                                                                                                                                                                                                                                                                                      |
|                                  | Enthusiasm     | "It was very similar to the first day I came to class as a teacher, I said: let's see what I find, let's see what I do. And if you had to name one emotion, I would say I felt excitement about going back to class." [PT_JGS1309_UAB]                                                                                                                                                                                                                                                                                                                                                                                                                                                                                                                                                                                                                                                                                                                                           |
| <b>Negative arousal emotions</b> | Nervous        | "I was nervous, because you have to improvise as a teacher. And I think that this experience awakens you to improvisation. And of course, that makes you nervous, it can make you overwhelmed." [PT_GAM2406_UCM]<br>I got a little nervous because I didn't know how to act according to the reactions of the kids. And I got a little lost, blocked. Then I was starting to get nervous. [T_25-Madrid]                                                                                                                                                                                                                                                                                                                                                                                                                                                                                                                                                                          |
|                                  | Uncertainty    | "What has surprised me the most is the fact that I am a person who reacts very quickly, even though I don't know what I'm doing, I act. And I've realized that for as many theory classes as I've had and as many scenarios as I've been able to imagine, during this practice I've had the moment of going blank and saying what am I supposed to do now?" [PT_JAG1601_UAB]                                                                                                                                                                                                                                                                                                                                                                                                                                                                                                                                                                                                     |
|                                  | Frustration    | "There's a point disorientation because the machine tells you 'You're teaching.' Well, but I don't know if I'm supposed to talk or not supposed to talk. And you're kind of in the expectation that something will happen." [PT_GPA1509_UAB]                                                                                                                                                                                                                                                                                                                                                                                                                                                                                                                                                                                                                                                                                                                                     |
|                                  | Discomfort     | "It's uncomfortable when you talk and no one responds to you. Aside from the fact that it makes you feel uncomfortable, I'm left with the frustration that I didn't get to be able to communicate effectively." [T_28_Barcelona]                                                                                                                                                                                                                                                                                                                                                                                                                                                                                                                                                                                                                                                                                                                                                 |
|                                  | Hostile        | "Mostly discomfort, because I was looking all the time for something that I didn't get to find until that action happened." [PT_SGG1309_UCM]                                                                                                                                                                                                                                                                                                                                                                                                                                                                                                                                                                                                                                                                                                                                                                                                                                     |
|                                  | Fearful        | "Especially the fact that they didn't answer you. In fact, I think that's why I laughed at the end, because it was a bit weird. Let's say it was a little hostile, not so much the insult, but the fact that he doesn't pay attention to you. [PT_SME1511_UCM]                                                                                                                                                                                                                                                                                                                                                                                                                                                                                                                                                                                                                                                                                                                   |
| <b>Emotional deactivation</b>    | Disappointing  | "I've felt a little scared." [PT_LA1905_UAB]                                                                                                                                                                                                                                                                                                                                                                                                                                                                                                                                                                                                                                                                                                                                                                                                                                                                                                                                     |
|                                  | Uncomfortable  | "I have a lot of resistance to all these virtual and video game topics. As a mother of children who are in these environments, they are a bit demonized, so they don't have an impact on me. I have seen it all a bit artificial." [PT_MST2009_UAB].<br>"I didn't feel comfortable because it was in front of unfamiliar people. My teammates, one is a friend of mine. The rest are not. I mean, it's partner contact and I felt very uncomfortable because this kind of situation already asks a lot of how you respond. I closed myself off. The truth is that I didn't want to continue the activity because I felt very vulnerable and that I wasn't responding as I was being asked to because I was feeling bad, the truth." [PT_RRG0206_UAB]<br>"Yes, but I tell you, it's because I wasn't there. I was more out there. There were times when I was there, focused on being there in a virtual reality, but it was two completely different realities." [PT_PBS3006UCM] |
